1 **Frequency of mosaicism points towards mutation-prone early cleavage cell**  
2 **divisions in cattle.**

3 *Chad Harland<sup>1#</sup>, Carole Charlier<sup>1#</sup>, Latifa Karim<sup>2</sup>, Nadine Cambisano<sup>2</sup>, Manon*  
4 *Deckers<sup>2</sup>, Myriam Mni<sup>1</sup>, Erik Mullaart<sup>3</sup>, Wouter Coppieters<sup>2</sup>, Michel Georges<sup>1</sup>.*

5 <sup>1</sup> Unit of Animal Genomics, GIGA-R & Faculty of Veterinary Medicine, University  
6 of Liège, Belgium. <sup>2</sup> GIGA Genomics Platform, University of Liège, Belgium. <sup>3</sup> CRV,  
7 Arnhem, The Netherlands.

8 *# Contributed equally to this work*

9 Correspondence: [michel.georges@ulg.ac.be](mailto:michel.georges@ulg.ac.be)

10

11 **It has recently become possible to directly estimate the germ-line de novo**  
12 **mutation (*dnm*) rate by sequencing the whole genome of father-mother-**  
13 **offspring trios, and this has been conducted in human<sup>1-5</sup>, chimpanzee<sup>6</sup>,**  
14 **mice<sup>7</sup>, birds<sup>8</sup> and fish<sup>9</sup>. In these studies *dnm*'s are typically defined as**  
15 **variants that are heterozygous in the offspring while being absent in both**  
16 **parents. They are assumed to have occurred in the germ-line of one of the**  
17 **parents and to have been transmitted to the offspring via the sperm cell or**  
18 **oocyte. This definition assumes that detectable mosaicism in the parent in**  
19 **which the mutation occurred is negligible. However, instances of**  
20 **detectable mosaicism or premeiotic clusters are well documented in**  
21 **humans and other organisms, including ruminants<sup>10-12</sup>. We herein take**  
22 **advantage of cattle pedigrees to show that as much as ~30% to ~50% of**  
23 ***dnm*'s present in a gamete may occur during the early cleavage cell**

24 **divisions in males and females, respectively, resulting in frequent**  
25 **detectable mosaicism and a high rate of sharing of multiple *dnm*'s between**  
26 **siblings. This should be taken into account to accurately estimate the**  
27 **mutation rate in cattle and other species.**

28 To study the process of *dnm*'s in the cattle germ-line, we sequenced the whole  
29 genome of 54 animals from four pedigrees. Grand-parents, parents and offspring  
30 (referred to as probands) were sequenced at average 26-fold depth (min = 21),  
31 and grand-offspring at average 21-fold depth (min = 10). The source of DNA was  
32 venous blood for females and sperm for males. The genome of one male proband  
33 (Pr 1) was sequenced both from semen (26-fold depth) and blood DNA (37-fold  
34 depth) (Figure 1A).

35 Using the standard definition, we identified 190 candidate *dnm*'s as variants that  
36 were (i) detected in a proband, (ii) absent in both parents (and grand-parents  
37 when available), (iii) transmitted to at least one grand-offspring, and (iv) not  
38 previously reported in unrelated individuals from the 1,000 Bulls project<sup>13</sup>  
39 (Suppl. Figure 1&2 and Suppl. Table 1). For confirmation, we developed  
40 amplicons spanning 113 candidate *dnm*'s and sequenced them at average depth  
41 of ~2,187 in the 54 animals plus 55 relatives (Figure 1A). This confirmed the  
42 genuine nature of 110/113 variants, demonstrating the excellent specificity of  
43 our bioinformatics pipeline. The three remaining ones were also detected in one  
44 of the parents (although not in the grand-parents) in the confirmation, and  
45 momentarily ignored.

46 We first examined what proportion of *dnm*'s detected in a proband might  
47 actually have occurred during its development rather than being inherited via

48 the sperm or oocyte. An unambiguous distinction between the two types of  
49 *dnm*'s is their degree of linkage with either the paternal or maternal haplotype  
50 upon transmission to the next generation (i.e. the grand-offspring in Figure 1A).  
51 *Dnm*'s that have occurred in the germ-line of the sire will show *perfect* linkage  
52 with the proband's paternal haplotype in the grand-offspring (i.e. always  
53 transmitted with the paternal haplotype, never transmitted with the maternal  
54 haplotype), while *dnm*'s that have occurred in the germ-line of the dam will show  
55 *perfect* linkage with the proband's maternal haplotype in the grand-offspring. On  
56 the contrary, *dnm*'s that have occurred during the development of the proband  
57 will be in *complete* (but imperfect) linkage with either the paternal or maternal  
58 haplotype (i.e. sometimes transmitted with the maternal haplotype, never  
59 transmitted with the paternal haplotype, or sometimes transmitted with the  
60 paternal haplotype, never transmitted with the maternal haplotype)(Suppl.  
61 Figure 1). Across the four pedigrees, 124 variants were in perfect linkage with  
62 the paternal haplotype, 32 in perfect linkage with the maternal haplotype, 10 in  
63 complete (but imperfect) linkage with the paternal haplotype and 21 in complete  
64 (but imperfect) linkage with the maternal haplotype (Figure 1B). If the 10+21  
65 *dnm*'s indeed occurred during the development of the proband rather than being  
66 inherited from the sire or dam, the *dnm* dosage (defined as the proportion of  
67 reads spanning the *dnm* site that carry the mutant allele) is expected to be < 50%  
68 in the proband but equal to 50% in the grand-offspring inheriting the *dnm*. The  
69 mean dosage was 0.26 in the proband, and 0.52 in the grand-offspring, and this  
70 difference was highly significant ( $p < 10^{-6}$ ). The corresponding means were 0.48  
71 and 0.49 ( $p = 0.40$ ) for the 124+32 mutations showing perfect linkage with  
72 either the paternal or maternal haplotype (Figure 1C).

73 We conclude that in cattle ~17% of *dnm*'s detected in an animal using standard  
74 procedures are not inherited from the sire or dam but correspond to premeiotic  
75 clusters generated during the development of the individual. This is a lower  
76 bound, as *dnm* will only be detected and recognized as having occurred in the  
77 proband if (i) the *dnm* dosage is sufficiently high for the proband to be called  
78 heterozygote, (ii) the *dnm* is transmitted to at least one grand-offspring, and (iii)  
79 complete (but imperfect) linkage is demonstrated in the grand-offspring (Suppl.  
80 Figure 3). We will refer to this type of *dnm*'s as Proband-Mosaic (PM), while the  
81 others will be referred to as Sire-Non-Mosaic (SNM) (meaning that the sire is not  
82 mosaic for a mutation transmitted via his sperm), or as Dam-Non-Mosaic (DNM)  
83 (meaning that the dam is not mosaic for a mutation transmitted via her oocyte).  
84 The proportion of PM (but not SNM and DNM) mutations differed significantly  
85 between probands ( $p = 0.004$ ); neither differed significantly between sexes ( $p >$   
86  $0.30$ ). Of particular interest, the three PM mutations of proband 1 were  
87 detected in both sperm and blood DNA (Suppl. Table 1), indicating that they  
88 occurred early in development (see hereafter).

89 If detectable mosaicism for *dnm*'s is common in the individual in whom they  
90 occurred, requiring their absence in the DNA of the parents (as typically done)  
91 will cause genuine *dnm*'s to be eliminated. We took advantage of the grand-  
92 parents available in three pedigrees to recover such events as variants that were  
93 (i) absent in the grand-parents, (ii) detected in either sire or dam with a dosage  
94 significantly  $< 50\%$  (Suppl. Table 1), (iii) transmitted to the proband with a  
95 dosage of  $\sim 50\%$ , (iv) transmitted to at least one grand-offspring with a dosage of  
96  $\sim 50\%$ , and (v) not previously reported in unrelated individuals<sup>13</sup>. We will refer

97 to these types of mutations as Sire-Mosaic (SM) and Dam-Mosaic (DM),  
98 respectively (meaning that the sire/dam is detectably mosaic for a *dnm*  
99 transmitted via the sperm/oocyte)(Suppl. Figure 1). We detected 61 such  
100 candidate events, including the 3/113 variants mentioned above (Suppl. Table 1  
101 and Suppl. Figure 2). We developed amplicons for 34, and sequenced (average  
102 1,498-fold depth) all 54 individuals plus 55 relatives (including  $\geq 5$  half-sibs of  
103 the probands) (Figure 1A). We took advantage of whole genome sequence  
104 information that became available for 27 half-sibs, to trace the inheritance of the  
105 remaining 24 candidate variants. The ensuing data indicated that 11/61  
106 candidates were genuine *dnm*'s but occurred in the germ-line of one of the  
107 grand-parents rather than one of the parents (dosage  $\sim 50\%$  in the sire or dam,  
108 and perfect linkage in the half-sibs). The SM/DM status was unambiguously  
109 demonstrated for 40 (dosage  $< 50\%$  in the sire or dam in the confirmation,  
110 transmission to half-sibs, and complete (but imperfect) linkage) and strongly  
111 supported for the remaining 10 (dosage  $< 50\%$  in the sire/dam in the  
112 confirmation or complete (but imperfect) linkage yet without transmission)  
113 (Suppl. Figure 2 and Figure 1B). Further supporting the genuine nature of the  
114 SM/DM mutations, the dosage was 0.12 on average in the corresponding parent,  
115 while being 0.51 in descendants ( $p < 10^{-6}$ ) (Figure 1C).

116 For *dnm*'s that were detectably mosaic in sperm (SM and PM in male probands),  
117 allelic dosage was significantly correlated with rate of transmission ( $p = 0.025$ )  
118 and strength of linkage ( $p = 0.0002$ ). These correlations were not significant for  
119 *dnm*'s that were detectably mosaic in blood (DM and PM in female probands).  
120 This suggests that the degree of mosaicism in the soma is a poor indicator of the

121 degree of mosaicism in the germ line (Figure 1D). Accordingly, the rate of  
122 transmission of the three PM mutations of proband 1 to its 53 offspring was  
123 better predicted by their dosage in sperm than in blood (Suppl. Figure 4).

124 Considering SNM/SM and DNM/DM mutations jointly, we conclude that on  
125 average a sire is detectably mosaic (in sperm) for 29% of *dnm*'s present in a  
126 sperm cell, while a dam is detectably mosaic (in blood) for 51% of *dnm*'s present  
127 in an oocyte. These are lower bounds as we only considered *dnm*'s for which the  
128 dosage was significantly  $< 0.5$  in the parent (condition (ii) above). These figures  
129 are possibly consistent with recent reports in the mouse ( $\sim 25\%$ )<sup>7</sup>, but  
130 considerably larger than current estimates in human ( $\sim 5\%$ )<sup>14</sup>. They are  
131 certainly larger than expected assuming that the mutation rate per cell division  
132 is uniform throughout development, and it suggests that the mutation rate is  
133 higher for early cell divisions (Suppl. Figure 5). Moreover, when analyzing the  
134 transmission patterns of SM and DM mutations to the half-sibs of the proband (in  
135 whom the *dnm*'s were detected), we were struck by the fact that (i)  $>60\%$  of half-  
136 sibs share at least one *dnm* with the proband, while  $<50\%$  are expected ( $p =$   
137  $0.05$ ), and (ii) half-sibs sharing multiple *dnm*'s with the proband appeared  
138 surprisingly common (Suppl. Table 2). These findings also indicate that a  
139 substantial proportion of *dnm*'s must occur early in development and be present  
140 in the precursor cells common to the soma and germ line (Suppl. Figure 5).

141 In mammals, after fertilization, cleavage, and segregation of (i) the inner cell  
142 mass from the trophoblast, (ii) the epiblast from the hypoblast, (iii) the  
143 embryonic epiblast from the amniotic ectoderm, a small number of epiblast-  
144 derived cells located in the wall of the yolk sac in the vicinity of the allantois are

145 induced to become primordial germ cells (PGCs). These migrate to the primitive  
146 gonad where they expand and produce >1 million gametogonia. Oogonia initiate  
147 meiosis prior to birth in females. Spermatogonia will resume mitotic divisions at  
148 puberty allowing (i) the maintenance of a pool of stem cell like spermatogonia,  
149 and (ii) sustained spermiogenesis involving ~3 additional mitotic divisions  
150 followed by meiosis (Suppl. Figure 6). We simulated the process of de novo  
151 mutagenesis in the male and female germ cell lineages assuming (i) uniform pre-  
152 and post-natal mutation rates per cell division, and (ii) 40 PGCs sampled at  
153 random from the embryonic epiblast-derived cells<sup>15</sup>. Pre- and post-natal  
154 mutation rates were adjusted to match the observed number of mutations per  
155 gamete (34 in sperm, 14 in oocytes). Under these conditions, we virtually never  
156 observed the level of mosaicism, nor the sharing between sibs characterizing the  
157 real data (Figure 2). We (i) increased the relative mutation rate during the early  
158 cell divisions (keeping the mutation rate per gamete constant)(10 and 20-fold  
159 increase during the first 4, 7, 11, 15 and 18 cell divisions; Suppl. Figure 6), (ii)  
160 reduced the number of induced PGCs (4, 10, or 40), and (iii) varied the  
161 relatedness between PGCs (i.e. sampled randomly amongst all embryonic  
162 epiblast-derived cells or from a sub-sector)(Suppl. Figure 6). Increasing the  
163 mutation rate during the very first cell divisions matched the real data much  
164 better (Figure 2). To quantitatively evaluate model fitting we used (i) the  
165 proportion of PM, SM and DM mutations with corresponding rate of mosaicism  
166 in sperm and soma, and (ii) the proportion of sibs sharing 0, 1, 2, ... *dnm*'s with a  
167 proband, to compute the likelihood of the data under different scenarios (see  
168 M&M). A 20-fold increased mutation rate during the first four cell divisions,  
169 combined with 4 related PGCs fitted the data best (Table 1 and Suppl. Table 2).

170 The data were  $\geq 10^{16}$  times less likely under models assuming a uniform mutation  
171 rate throughout development, and  $\geq 10^5$  times less likely assuming an increased  
172 mutation rate passed the 7<sup>th</sup> cell division (after segregation of inner cell mass  
173 and throphoblast)(Table 1 and Suppl. Table 2).

174 When accounting for genome coverage, the estimated number of *dnm*'s per  
175 gamete (SNM+SM, DNM+DM) averaged 46.6 for sperm cells and 18.1 for oocytes  
176 (male/female ratio of 2.6), corresponding to an average mutation rate of  
177  $\sim 1.2 \times 10^{-8}$  per base pair per gamete. Including an estimate (from the simulations)  
178 of the number of missed SM ( $\sim 3.3$ ) / DM ( $\sim 1.1$ ) and misclassified PM mutations  
179 ( $\sim 2.9$  to  $\sim 8$  depending on the proband), yields an average mutation rate of  
180  $\sim 1.17 \times 10^{-8}$  per base pair per gamete and a male/female ratio of 2.4. The  
181 standard approach of ascertaining *dnm*'s (i.e. erroneously considering PM  
182 mutations, ignoring SM and DM mutations) would have yielded a mutation rate  
183 of  $0.9 \times 10^{-8}$  per bp per gamete, with a 2.5-fold higher mutation rate in bulls than  
184 in cows.

185 Two hundred twenty of the 237 identified *dnm*'s were nucleotide substitutions,  
186 17 small insertion-deletions. The non-mosaic classes of mutations (SNM and  
187 DNM) were  $\sim 30$ -fold enriched in CpG>TpG transitions as expected. This  
188 signature was also present but less pronounced for mosaic mutations (PM, SM  
189 and DM). Mosaic mutations were  $\sim 2.6$ -fold enriched in C>A and/or G>T  
190 transversions, largely due to GpCpA>GpApA and TpCpT>TpApT substitutions  
191 (Figure 3). This was unlikely to be an artifact for reasons spelled out in Suppl.  
192 Figure 7. It is noteworthy that this is exactly the same mutational signature as  
193 the one recently reported for human embryonic somatic mutations<sup>16</sup>. There



194 was no obvious difference between the profile of *dnm*'s in the male and female  
195 germ line (data not shown). In general, *dnm*'s appeared uniformly scattered  
196 across the genome (Suppl. Figure 8).

197 The enrichment of C>A/G>T transversions in the mosaic mutations caused the  
198 overall Ti/Tv ratio to be 1.33, well below expectations. This was likely due to  
199 sampling variation (meaning that Ti/Tv ratios might differ between families and  
200 that we by chance sampled families at the low end), as the Ti/Tv ratio was 1.99  
201 for 2,530 candidate *dnm*'s detected with the same bioinformatics pipeline in a  
202 follow-up study of 113 probands (excluding the ones analyzed in this work), i.e.  
203 closer to expectations and the 2.2 Ti/Tv ratio of SNPs segregating in the  
204 Holstein-Friesian dairy cattle population (MAF  $\leq$  0.01; rare allele considered to  
205 be the derived allele). However, the spectrum of the 2,530 *dnm*'s remained  
206 significantly different from the SNP spectrum, with an excess of C>A/G>T  
207 transversions in the mosaic class of mutations, an excess of C>T/G>A transitions  
208 in both mosaic and non-mosaic mutations, and a paucity of T>C/A>G transitions  
209 in both mosaic and non-mosaic mutations (Suppl. Figure 7). This could point  
210 towards recent alterations of the mutational profile in domestic cattle. It is  
211 worth noting in this regard that most analyzed animals were bred using artificial  
212 insemination and/or in vitro embryo production. It seems unlikely that artificial  
213 insemination with frozen semen could explain the observed familial clustering of  
214 specific *dnm*'s. However, it is conceivable that in vitro maturation, fertilization  
215 and culture of oocytes and embryos affect the *dnm* rate, possibly by perturbing  
216 DNA replication. It is important to determine whether this is the case, especially  
217 as the same methods are increasingly used in human reproduction.

218 *Dnm*'s occurring during the development of an individual, should a priori affect  
219 the maternal and paternal chromosome with equal probability. When  
220 considering the PM, SM and DM jointly, 48 mosaic mutations occurred on the  
221 maternal chromosome versus 31 on the paternal chromosome ( $p = 0.11$ ). This  
222 trend suggests that the maternal and paternal chromosomes might be  
223 epigenetically distinct during early development and that this may affect their  
224 mutability.

225 Our work points towards the fact that direct estimates of mutation rates from  
226 sequencing families may have to be revisited, taken PM, SM and DM status into  
227 account, to obtain more accurate estimates of the mutation rate per gamete and  
228 per generation. This may affect both the overall mutation rate as well as its  
229 male/female ratio. However, our analyses suggest that the effect is likely to be  
230 modest and would, for instance, be insufficient to explain the present 2-fold  
231 discrepancy between direct and indirect estimates in human studies<sup>17,18</sup>. We  
232 confirmed by simulation that the rate of mosaicism does not significantly affect  
233 the rate of nucleotide substitution per generation or average fixation time<sup>19</sup>  
234 (Suppl. Figure 9).

235 Our work calls for a careful reevaluation of the importance of mosaicism for  
236 *dnm*'s in humans. If more common than presently appreciated, the recurrence  
237 risk of *dnm*-dependent disorders in sibs may be higher than generally assumed  
238 <sup>11,17</sup>. Moreover, a non-negligible proportion of true *dnm*'s may have been ignored  
239 (because they were detected at low dosage in the parents) in *dnm*-dependent  
240 searches for genes underlying inherited disorders hence reducing the potential  
241 power of such studies.

242

## 243 **Acknowledgements**

244 This work was funded by the DAMONA Advanced ERC project to Michel Georges.  
245 Carole Charlier is Senior Research Associate from the Fonds de la Recherche  
246 Scientifique - FNRS (F.R.S.-FNRS). Chad Harland has been funded in part by  
247 Livestock Improvement Corporation (New Zealand). We are grateful to Erik  
248 Mullaart and CRV (Arnhem the Netherlands) for providing us with the sperm and  
249 blood samples. We used the supercomputing facilities of the Consortium des  
250 Equipements de Calcul Intensif en Fédération Wallonie Bruxelles (CECI) funded  
251 by the F.R.S-FNRS.

252

## 253 **Authors contributions**

254 MG, CH, CC: designed the experiments. EM: provided samples. LK, NC, MD, WC:  
255 performed the sequencing. CH, MG, CC: analyzed data. MG, CH, CC: wrote the  
256 paper.

257

## 258 **Data availability**

259 All sequence data will be made freely available in public databases.

260

## 261 **References**

- 262 1. Roach JC et al. Analysis of Genetic Inheritance in a Family Quartet by Whole-  
263 Genome Sequencing. *Science* **328**: 636–639 (2010).
- 264 2. Conrad DF et al. Variation in genome-wide mutation rates within and between  
265 human families. *Nat Genet* **43**: 712–714 (2011.).
- 266 3. Kong A et al. Rate of de novo mutations and the importance of father/s age to  
267 disease risk. *Nature* **488**: 471–475 (2012).
- 268 4. Campbell CD et al. Estimating the human mutation rate using autozygosity in a  
269 founder population. *Nat Genet* **44**: 1277–1281 (2012).
- 270 5. Michaelson JJ et al. Whole-Genome Sequencing in Autism Identifies Hot Spots  
271 for De Novo Germline Mutation. *Cell* **151**: 1431–1442 (2012).
- 272 6. Venn O et al. Strong male bias drives germline mutation in chimpanzees.  
273 *Science* **344**:1272-1275 (2014).
- 274 7. Lindsay SJ et al. Striking differences in patterns of germline mutation between  
275 mice and humans. doi: <https://doi.org/10.1101/082297>
- 276 8. Smeds L, Qvarnström A, Ellegren H Direct estimate of the rate of germline  
277 mutation in a bird. *Genome Res.* **26**: 1211-1218 (2016).
- 278 9. Feng C et al. Moderate nucleotide diversity in the Atlantic herring is associated  
279 with a low mutation rate. *eLife*, in press (2017).
- 280 10. Woodruff RC & Thompson JN. Have premeiotic clusters of mutation been  
281 overlooked in evolutionary theory? *J. Evol. Biol.* **5**:457-464 (1992).
- 282 11. Campbell IM et al. Somatic mosaicism: implications for disease and  
283 transmission genetics. *Trends Genet.* **31**:382-392 (2015).

- 284 12. Smit M et al. Mosaicism of Solid Gold supports the causality of a noncoding A-  
285 to-G transition in the determinism of the callipyge phenotype. *Genetics* **163**:453-  
286 456 (2003).
- 287 13. Daetwyler HD et al. Whole-genome sequencing of 234 bulls facilitates  
288 mapping of monogenic and complex traits in cattle. *Nat Genet* **46**:858-865  
289 (2014).
- 290 14. Rahbari R et al. Timing, rates and spectra of human germline mutation.  
291 *Nature Genetics* **48**: 126-133 (2016).
- 292 15. Ohinata et al. Blimp1 is a critical determinant of the germ cell lineage in mice.  
293 *Nature* **437**:207-213 (2005).
- 294 16. Ju YS et al. Somatic mutations reveal asymmetric cellular dynamics in the early  
295 human embryo. *Nature* **543**: 714-718 (2017).
- 296 17. Scally A. Mutation rates and the evolution of germline structure. *Philos Trans*  
297 *R Soc Lond B Biol Sci* **371**: 20150137 (2016).
- 298 18. Segurel L, Wyman MJ, Przeworski M. Determinants of mutation rate variation  
299 in the human germline. *Annu Rev Genomics Hum Genet* **15**:47-70 (2014).
- 300 19. Woodruff RC & Thomson JN. The fundamental theorem of neutral evolution:  
301 rates of substitution and mutations should factor in premeiotic clusters. *Genetics*  
302 **125**: 333-339 (2005).
- 303
- 304
- 305
- 306

307

308

309

310

311

312

313

314

315

316

317

318

319

320

321

322

323

324

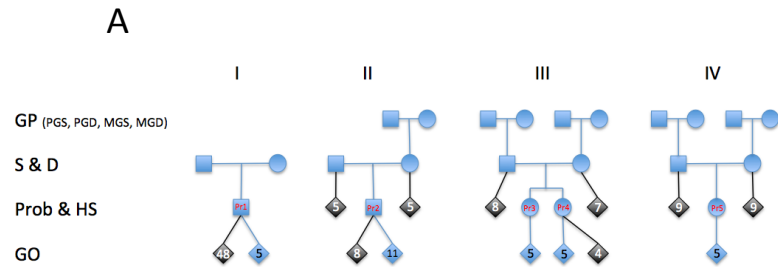

**B**

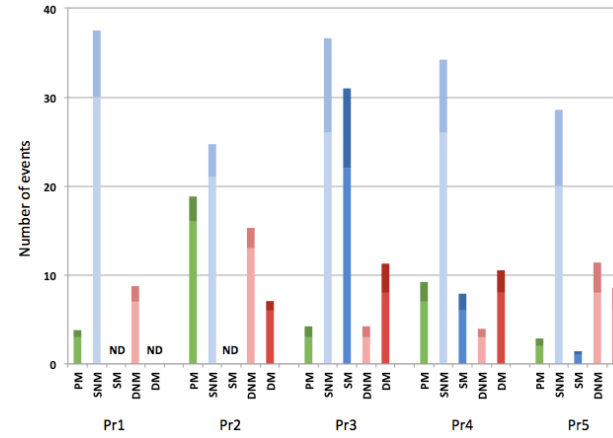

**C**

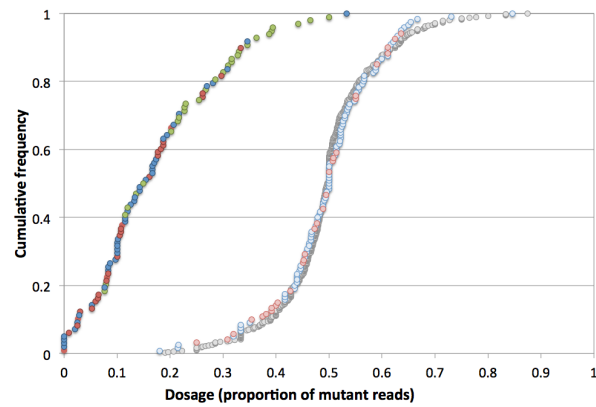

**D**

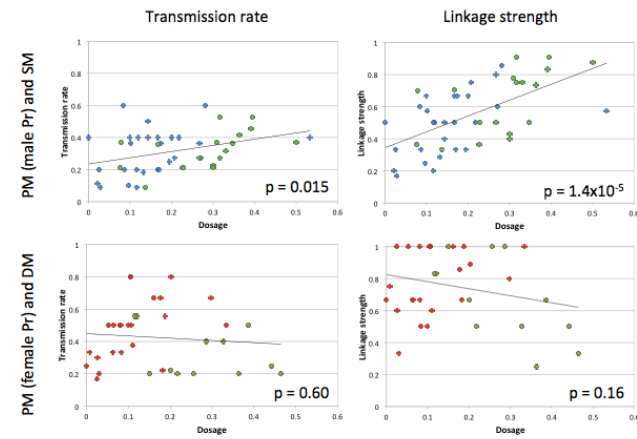

325 **Figure 1: (A) Four pedigrees (I, II, III, IV) used for the detection of *dnm*'s.** GP: grand-parents (PGS: paternal grand-sires, PGD,  
326 paternal grand-dams, MGS: maternal grand-sires, MGD: maternal grand-dams), S: sires, D: dams, Pr: probands, HS: half-sibs (of the  
327 proband), GO: grand-offspring. The five probands are labeled in red. Animals in blue were genome-sequenced at average depth of 23  
328 and used for the detection of *dnm*'s. Animals in gray were used for confirmation by whole genome (average sequence depth of 20) or  
329 targeted sequencing (see Supplemental Methods). DNA was extracted from venous blood for females, and semen from males, except for  
330 Proband 1 for which both semen and blood DNA were analyzed. **(B) Numbers and types of *dnm*'s detected in the five probands (Pr1,  
331 Pr2, Pr3, Pr4), Pr5).** Green: PM = proband mosaic, Light blue: SNM = sire non mosaic, Dark blue: SM = sire mosaic, Light red: DNM =  
332 dam non mosaic, Dark red: DM = dam mosaic. For each bar, the lower light section corresponds to the actual number of detected *dnm*'s,  
333 the upper darker section to an extrapolation to the whole genome based on the estimated coverage. ND = not done (because the  
334 corresponding grand-parents were not sequenced). **(C) Cumulative frequency distribution of *dnm* dosage estimated as the  
335 proportion of reads carrying the mutation.** Green circles: PM mutations in the probands. Light blue circles: SNM mutations in the  
336 probands. Light red circles: DNM mutations in the probands. Dark blue circles: SM mutations in the sires. Dark red circles: DM  
337 mutations in the dams. Grey circles: corresponding PM, SNM, DNM, SM and DM mutations in the grand-offspring. The three SM and one  
338 DM variant with dosage of 0, were shared between the proband and at least one half-sib yet not detectable in the semen or blood of the  
339 corresponding parent. **(D) Relationship between the *dnm* dosage (fraction of mutant reads) and the rate of transmission to offspring  
340 (left) and strength of linkage (right) for mutations that are detectably mosaic in the sperm of a male parent (upper), or in the blood of a  
341 female parent (lower).** Green circles: PM mutations, blue circles: SM mutations, red circles: DM mutations. The corresponding  
342 correlations were significant in males ( $p = 0.015$  and  $1.4 \times 10^{-5}$ ) but not in females ( $p = 0.60$  and  $0.16$ ).

343

344

345

346

347

348

349

350

351

352

353

354

355

356

357

358

359

360

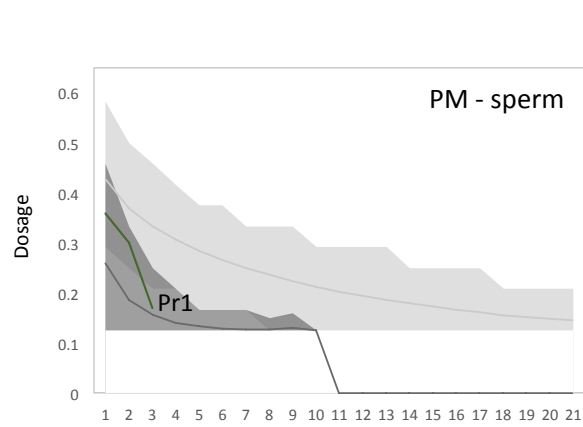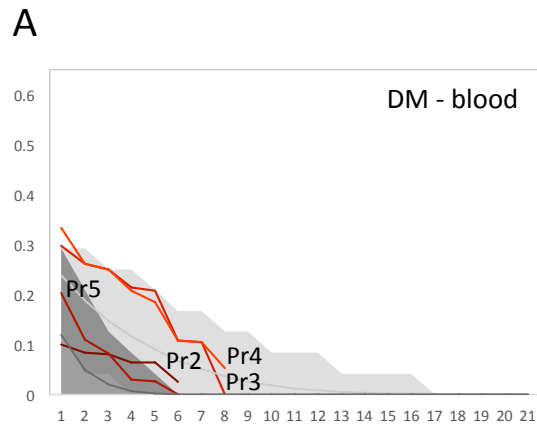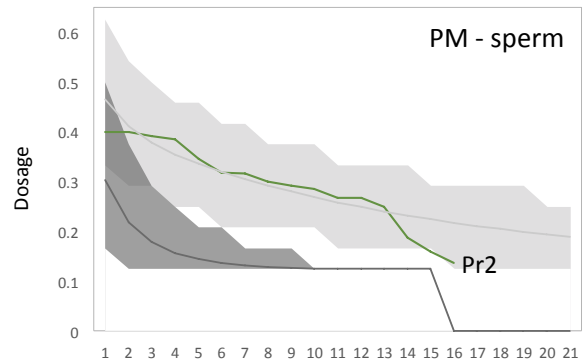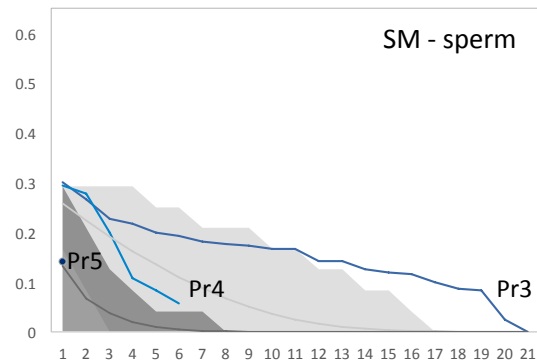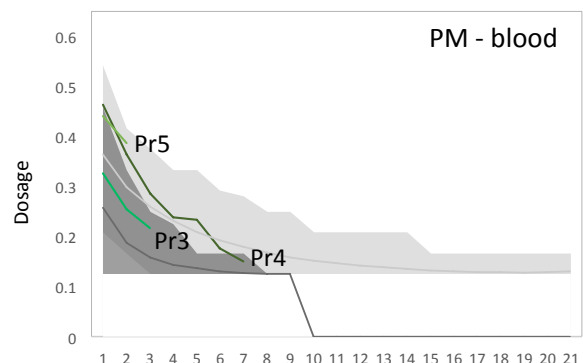

Dnm ordered by mosaicism

B

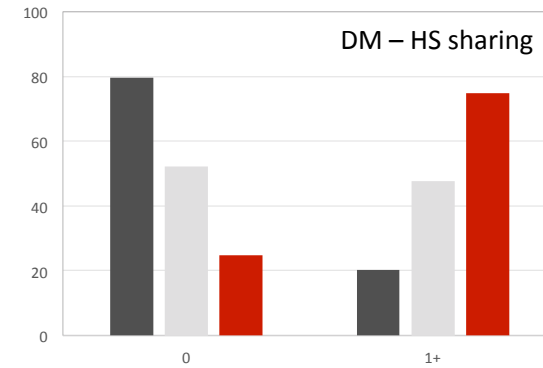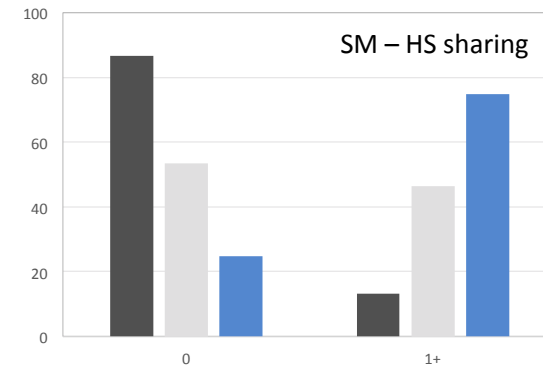



361 **Figure 2: (A)** *Dnm*'s with detectable mosaicism in sperm DNA of male probands (PM – sperm) or sires (SM – sperm), or in blood DNA of  
362 female probands (PM – blood) or dams (DM – blood), ranked by observed rate of mosaicism. Colored lines: real data. Pr1-5: proband 1-  
363 5. Dark gray shaded area: 95% confidence interval obtained from simulations assuming uniform mutation rate per cell division and 40  
364 unrelated PGCs. Light gray shaded area: 95% confidence interval obtained from simulations assuming 20-fold higher mutation rate  
365 during the first 4 cell divisions, and 4 related PGCs (Table 1). **(B)** Distribution of the proportion of half-sibs (HS) of the probands that  
366 share 0, or at least 1 (1+) of the *dnm*'s detected in the corresponding proband. Red bars: real observations for *dnm*'s transmitted by the  
367 dam (DM+DNM). Blue bars: real observations for *dnm*'s transmitted by the sire (SM+SNM). Dark grey bars: expectation under the null  
368 hypothesis of uniform prenatal mutation rate per cell division and 40 unrelated PGCs. Light grey bars: expectation under the best  
369 alternative model assuming a 20x increased mutation rate during the first 4 cell division and 4 related PGCs (Table 1).

370

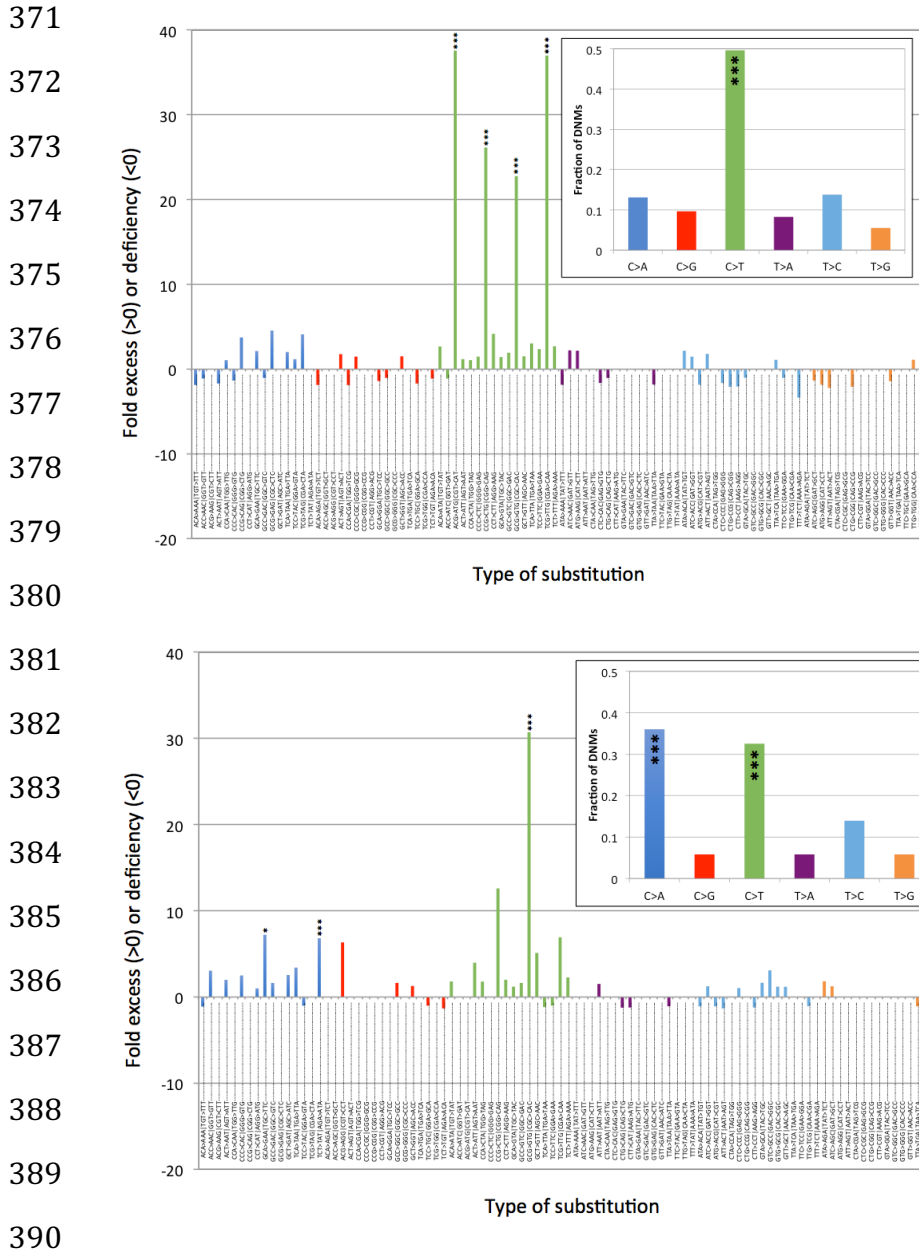

391 **Figure 3: (A)** SNM and DNM (i.e. *dnm*'s assumed to have occurred in the later  
 392 stages of gametogenesis): fold excess or deficiency over expected for specific  
 393 nucleotide substitutions accounting for trinucleotide context. Inset: Proportion  
 394 of *dnm*'s corresponding to the six possible types of nucleotide substitutions. **(D)**  
 395 Idem for PM, SM and DM (i.e. *dnm*'s assumed to have occurred in the early stages  
 396 of gametogenesis). \*\*\*:  $p < 0.001$ , \*:  $p < 0.05$  (accounting for multiple testing by  
 397 Sidak correction).

398

399 **Table 1: Relative likelihood of the observations under different models of**  
400 **gametogenesis**

| Fold increase mutation rate | During first x cell divisions | Number of PGCs | Related PGCs or not | Log(LR) |
|-----------------------------|-------------------------------|----------------|---------------------|---------|
| <b>20x</b>                  | <b>4</b>                      | <b>4</b>       | <b>T</b>            | 0.00    |
| <b>10x</b>                  | 4                             | 4              | T                   | -0.35   |
| 20x                         | 4                             | 4              | <b>F</b>            | -0.40   |
| 10x                         | <b>7</b>                      | 4              | F                   | -1.57   |
| 20x                         | 4                             | <b>10</b>      | T                   | -1.74   |
| 20x                         | 4                             | <b>40</b>      | T                   | -3.45   |
| 10x                         | <b>11</b>                     | 4              | T                   | -5.09   |
| 20x                         | <b>15</b>                     | 4              | T                   | -7.03   |
| 10x                         | <b>18</b>                     | 4              | T                   | -9.46   |
| <b>1x</b>                   | 7                             | 4              | T                   | -16.17  |

401 The first four columns correspond to the parameters that were tested in the model: (i)  
402 the fold increase of the mutation rate (1x, 10x, 20x), (ii) during the x first cell divisions  
403 (4, 7, 11, 15, 18), (iii) the number of PGCs (4, 10, 40), and (iv) the ontogenetic  
404 relatedness of the PGCs (F(false) or T(true)). Log(LR) corresponds to the logarithm  
405 (base 10) of the likelihood of the data relative to the best model (first line).  
406 Parameters are in bold when the corresponding model is the best given that  
407 parameter value. We only show results for models that are the best given at least one  
408 parameter value. Likelihoods of all models are given in Suppl. Table 3.

409

## 410 **Methods**

411 **Whole genome sequencing.** DNA was extracted from sperm (for males) or  
412 whole blood (females and one male) for the four families and their relatives  
413 using standard procedures. Familial relationships were confirmed by  
414 genotyping all DNAs with the 10K Illumina SNP chip. We constructed 550bp  
415 insert size whole genome Illumina Nextera PCR free libraries following the  
416 protocols recommended by the manufacturer. All samples were then sequenced  
417 on Illumina HighSeq 2000 instruments, using the 2x100bp paired end protocol  
418 by the GIGA Genomics platform (University of Liege). Data was mapped using  
419 BWA mem (version 0.7.9a-r786)<sup>20</sup> to the BosTau6 reference genome. Alignments  
420 were processed according to the GATK<sup>21</sup> best practices version 2 with PCR  
421 duplicates marked, Indel realignment and Base Quality Score Recalibration using  
422 known sites. GATK HaplotypeCaller (version 3.4) was used according to the N+1  
423 workflow to generate variants from the alignments. Common variants were then  
424 compared to a 10K Illumina SNP chip for each individual to confirm the identity  
425 of the library.

426 **Detection of de novo mutations.** We developed a suite of scripts to identify  
427 *dnm's* from a vcf file produced by GATK and containing sequence information  
428 about members of four-generation pedigrees such as the ones described in Fig. 1.  
429 The first ("4\_phaser\_4\_gen.pl") generates the linkage phase for the parents (sire  
430 and dam), the proband, and the grand-offspring. Phasing is done based on high  
431 quality variant positions and genotypes (f.i. QUAL score  $\geq$  50,000; PL scores  $\geq$   
432 100; sequence depth  $\leq$  2.5x the average sequence depth). The outcome is  
433 knowledge of the grand-parental origin of the paternal and maternal

434 chromosomes of the proband including the identification of cross-over events, as  
435 well as the grand-parental origin of the chromosomes transmitted by the  
436 proband to the grand-offspring including the identification of cross-over events.  
437 The second module (“5\_de\_novo\_detector\_4\_gen.pl”) identifies the candidate  
438 *dnm*’s per se. It first identifies diallelic variant positions for which all grand-  
439 parents, sire, dam and proband have a genotype and sequence coverage between  
440 set limits (f.i. 10 and 60). The proportion of variants sites satisfying these depth  
441 limits was used to estimate the proportion of the genome (of the total of the  
442 2,670,422,299 base pairs in the bovine Bostau6 build) that was explored.  
443 Candidate *dnm*’s were then identified as sites for which (i) the QUAL score was  $\geq$   
444 100, (ii) the proband had genotype 0/1 with corresponding PL-scores  $\geq$  40, (iii)  
445 none of the grand-parents had reads with the alternate allele (AD = x,0), (iv)  
446 either the sire or the dam had no reads with the alternate allele, and (v) reads  
447 with the alternate allele were found in the grand-offspring. The same script also  
448 determines the genotype frequencies (0/0, 0/1 and 1/1) at the corresponding  
449 position in sequenced individuals outside of the pedigree that are not  
450 descendants of the sire or the dam. The third module  
451 (“6\_germline\_assigner\_4\_gen.pl”) combines the output of the first and second  
452 module to determine in which individual the *dnm* is most likely to have occurred  
453 (one of the four grand-parents, sire or dam, or proband) and on which grand-  
454 parental chromosome it occurred. All candidate *dnm*’s were manually curated  
455 using the Integrated Genome Viewer (IGV)<sup>22</sup>. *Dnm*’s with mutant reads in either  
456 sire or dam (even if called 0/0 by GATK) were relabeled as SM or DM, provided  
457 that the *dnm* segregated in complete (but imperfect) linkage with the paternal or  
458 maternal haplotype (respectively), in the half-sibs of the proband.

459 To test the corresponding pipeline, we identified 11,255 variants (of which  
460 10,093 SNPs) for which Pr2 was heterozygous and which were not present in  
461 unrelated individuals including from the 1,000 Bulls project. The corresponding  
462 “genotype fields” of the parents and grand-offspring were modified in the vcf file  
463 such that the genotype (GT) was set at 0/0 and the unfiltered allele depth (AD) of  
464 the derived allele set at 0. The Ti/Tv ratio for the corresponding SNPs was  
465 1.9922. The proportion of the genome explored was estimated at 76% as  
466 described above. The pipeline detected 9,325 variants (83% sensitivity) of  
467 which 8,409 SNPs (81% sensitivity). The Ti/Tv ratio amongst detected *dnm*'s  
468 was 1.9989, indicating that the pipeline did not introduce a Ti/Tv bias.

469 **Confirmation of candidate *dnm*'s.** PCR primers were then designed for each  
470 candidate passing the quality check in IGV using BatchPrimer<sup>23</sup> targeting a  
471 product size of 200-1000bp with at least one primer being present in unique  
472 (non-repeat) sequence (as identified by repeatmasker). The resulting amplicons  
473 were sequenced on an Illumina MiSeq instrument using the 2x250bp paired end  
474 protocol. The sequenced amplicons were aligned to the BosTau6 reference  
475 genome using BWA mem and candidate de novo mutations were checked in IGV  
476 and variants were called using freebayes (v1.0.2-15-g357f175)<sup>24</sup>.

477 **Modeling gametogenesis.** (i) Data types: To compare the adequacy of the  
478 different gametogenesis models we computed the likelihood of three types of  
479 data. The first is the degree of mosaicism in the parent across *dnm*'s detected in  
480 a given gamete. Thus we may have detected  $n$  SM and  $m$  SNM *dnm*'s in a given  
481 sperm cell. The  $n$  SM *dnm*'s have dosages in the paternal sperm DNA of  $x_1, x_2,$   
482  $x_3, \dots, x_n > 0$  while the  $m$  SNM *dnm*'s have a dosage of 0. We have three such lists

483 for Pr3, Pr4 and Pr5. Likewise, we may have detected  $n$  OM and  $m$  ONM *dnm*'s in  
484 a given oocyte. The  $n$  OM *dnm*'s have dosages in the maternal blood DNA of  $x_1, x_2,$   
485  $x_3, \dots, x_n > 0$  while the  $m$  ONM *dnm*'s have a dosage of 0. We have four such lists  
486 for Pr2, Pr3, Pr4 and Pr5.

487 The second data set consists in lists of PM *dnm*'s and their dosage ( $x_1, x_2, x_3, \dots, x_n$   
488  $> 0$ ) in sperm (Pr1 and Pr2) or blood DNA (Pr3, Pr4, Pr5).

489 The third data type consists in the number of *dnm*'s detected in a gamete  
490 transmitted to a proband, and the numbers of those shared by the studied half-  
491 sibs of the proband. Thus, we may have detected  $n$  SM and  $m$  SNM *dnm*'s in a  
492 sperm cell (or oocyte) transmitted to a given proband, of which half-sib 1 will  
493 share  $x_1$ , half-sib 2  $x_2, \dots$ , where  $x_i \leq n$ .

494 (ii) Computing probabilities under various models of gametogenesis: For data  
495 type 1, we simulated the process of de novo mutation in the female and male cell  
496 lineages described in Suppl. Figure 6. For the null hypothesis, the mutation rate  
497 per cell division before birth was set at an average of 0.77 (Poisson distributed),  
498 such that the number of *dnm*'s per oocyte averaged 14 (as observed). The  
499 mutation rate per cell division after birth was set at an average of 0.3 (Poisson  
500 distributed), such that the number of *dnm*'s per sperm cell averaged 34 (as  
501 observed). For alternative hypotheses, the mutation rate for the early cleavage  
502 cell divisions (4, 7, 11, 15 and 18 first cell divisions, corresponding to the  
503 different development stages in Suppl. Figure 6) was increased 10- or 20-fold  
504 when compared to the remaining prenatal cell divisions, for which the mutation  
505 rate was concomitantly reduced such that the overall number of *dnm*'s per  
506 oocyte remained unaffected (average of 14). We further tested 4, 10 and 40

507 induced PGCs, and unrelated or related induced PGCs as described in Suppl. Fig.  
508 6. For all 90 possible scenarios, we determined by simulation what proportion of  
509 *dnm*'s found in a sperm cell (respectively oocyte) were characterized by a dosage  
510 in paternal sperm (respectively maternal soma) of 0-0.05, 0.05-0.10, ... These  
511 proportions were then used as probabilities in computing the likelihood of the  
512 data (i.e. a series *dnm*'s with corresponding rate of mosaicism in the parental  
513 tissue) under the corresponding model. Given our experimental design, SM and  
514 DM are only recognized as such, if (i) their dosage in the sire (SM) or dam (DM)  
515 is significantly  $< 0.5$ , and (ii) they show complete (but imperfect) linkage in the  
516 available half-sibs. [We considered a fixed number of eight half-sibs in the](#)  
517 [simulations.](#) These conditions were included in the simulations. Thus a mutation  
518 was only considered if it satisfied these two criteria. The dosage that was  
519 considered was not the true dosage for that mutation, but the "realized" dosage  
520 assuming a sequence depth of 24.

521 To compute the likelihood of the second type of data, we simulated  
522 gametogenesis in exactly the same way as for data type 1. We then randomly  
523 sampled  $n$  gametes, where  $n$  corresponds to the number of GO (hence 5 for Pr1,  
524 Pr3-5, and 11 for Pr2). For all *dnm*'s in these  $n$  gametes, we then determined the  
525 dosage in the germ-line (Pr1, Pr2) or soma (Pr3-5). For all 90 possible scenarios,  
526 we determined by simulation what proportion of PM *dnm*'s detected in sperm of  
527 blood DNA were characterized by a dosage of 0-0.05, 0.05-0.10, ... These  
528 proportions were then used as probabilities in computing the likelihood of the  
529 data (i.e. a series PM *dnm*'s with corresponding dosage in sperm or blood) under  
530 the corresponding model. With the real data, PM mutations are only recognized



531 as such (i) if they are transmitted to at least one of the  $n$  offspring, (ii) if the  
532 proband is called heterozygous for the corresponding  $dnm$  by GATK, and (iii) if  
533 we demonstrate complete (but imperfect) linkage in the GO. Condition (i) is  
534 achieved in the simulation by sampling  $n$  gametes at random. Condition (ii) and  
535 (iii) were modeled in the simulations. [We considered five and eleven GO to](#)  
536 [match the real data.](#) Thus a mutation was only considered if it satisfied these  
537 two criteria. The dosage that was considered was not the true dosage for that  
538 mutation, but the “realized” dosage assuming a sequence depth of 24.

539 For data type 3, we modified the simulations in order to exactly generate a  
540 predetermined number  $n$  of  $dnm$ 's in a given “reference” gamete. Thus if in the  
541 real data an oocyte was characterized by 11  $dnm$ 's (f.i. Pr3 and Pr4), we would in  
542 the simulations distribute 11  $dnm$ 's across the (7+4+4+3+18) cell divisions  
543 leading to a simulated reference oocyte and track their segregation (according to  
544 their point of occurrence) across the entire germ line lineage. Under the null  
545 hypothesis of uniform prenatal mutation rate, all 36 cell divisions would have  
546 equal chance to be hit by anyone of the 11 mutations. Under the alternative  
547 hypotheses, early cleavage cell divisions would have a 10- or 20-fold higher  
548 chance than the remaining ones. Under the hypothesis of related PGCs the  
549 segregation pattern of early mutations in the germ line lineage would be  
550 concomitantly affected (see Suppl. Fig. 6). We would then samples gametes at  
551 random from the same germ line tree and count the number of mutations shared  
552 with the “reference” gamete. This would generate a frequency distribution of  
553 gametes sharing 0, 1, 2, ... ,  $n$   $dnm$ 's with the reference gamete. The  
554 corresponding frequencies were then used as probabilities in computing the

555 likelihood of the data (i.e. a series half-sibs sharing 0, 1, ... ,  $n$  *dnm*'s with the  
556 reference gamete transmitted to the proband) under the corresponding model.

557 Likelihoods of the data under the 90 tested models were then simply computed  
558 as the product of the probabilities of all *dnm*'s (data type 1 and 2) and half-sibs  
559 (data type 3) extracted from the simulations performed under the corresponding  
560 model.

561 (iii) Estimating the number of missed SM and DM and misclassified PM  
562 mutations: The simulations for dataset 1 allowed us to estimate the number of  
563 SM and DM mutations missed either because the “realized” dosage was too high in  
564 the parent, or because we could not demonstrate complete (but imperfect)  
565 linkage in the half-sibs. Likewise the simulations for dataset 2 allowed us to  
566 estimate the number of PM mutations that, although detected (realized dosage  
567 sufficient to be called heterozygous by GATK), were misclassified as SNM or DNM  
568 mutations because showing perfect linkage in the available GO. Under the best  
569 biological model (20x increased mutation rate during the first 4 cell divisions, 4  
570 related PGCs, see Table 1), these numbers were: (i) average loss of 3.3 SM  
571 mutations, (ii) average loss of 1.1 lost DM mutations, (iii) average gain of 1.45  
572 SNM and 1.45 DNM mutations for a male proband with 11 GO, (iv) average gain of  
573 4 SNM and 4 DNM mutations for a male proband with 5 GO, and (v) average gain  
574 of 1.8 SNM and 1.8 DNM mutations for a female proband with 5 GO.

575

576 20. Li H & Durbin R. Fast and accurate short read alignment with Burrows-  
577 Wheeler transform. *Bioinformatics* **25**: 1754-1760 (2009).

- 578 21. McKenna A *et al.* The Genome Analysis Toolkit: a MapReduce framework for  
579 analyzing next-generation DNA sequencing data. *Genome Res.* **20**: 1297-1303  
580 (2010).
- 581 22. Robinson JT *et al.* Integrative Genomics Viewer. *Nature Biotechnology* **29**:24–  
582 26 (2011).
- 583 23. You FM *et al.* BatchPrimer3: a high throughput web application for PCR and  
584 sequencing primer design. *BMC Bioinformatics* **9**:253 (2008).
- 585 24. Garrison E, Marth G. Haplotype-based variant detection from short-read  
586 sequencing. arXiv preprint arXiv:1207.3907 [q-bio.GN]. (2012) .
- 587
- 588
